# Supplementary material for: Ovalbumin-sensitized mice have altered airway inflammation to agriculture organic dust
Source: Springer Nature journal article supplement (doi:10.1186/s12931-019-1015-0), 2019-03-07

# Supplemental Figure 1.

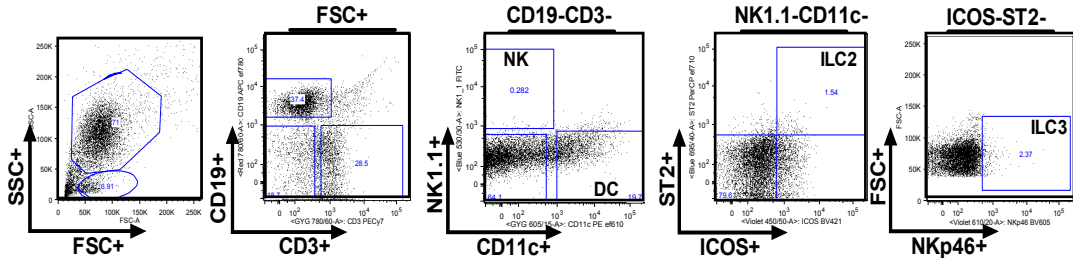

Supplement: MOESM1 [file 16532666]
